# Supplementary material for: Fungal Consortia Mediated Bio-Treatment of Organic Matter and Metals Uptake from Sewage Water: Maize Agro-Physiological Assessment
Source: MDPI journal article supplement (doi:10.3390/catal14040257), 2024-04-12
Supplement: s1 [file s1]

### Supplementary Materials

**Table S1.** Growth traits determination after 40 days of maize cultivation and irrigation with Sewage water (treated in the lab scale or in the STP or untreated) and clean water as control.

| Treatments     | Dilution          | Mean of leaf length | No. of leaf | Leaf breadth | Leaf radius | Max of Leaf length | Aerien part length | Root length |
|----------------|-------------------|---------------------|-------------|--------------|-------------|--------------------|--------------------|-------------|
| <b>Block 1</b> |                   |                     |             |              |             |                    |                    |             |
| USW            | D <sub>0</sub>    | 18,917              | 6           | 4.00         | 2.00        | 33.00              | 24.00              | 21.00       |
| USW            | D <sub>1/2</sub>  | 18.786              | 7           | 2.50         | 1.25        | 35.50              | 48.00              | 20.00       |
| USW            | D <sub>1/4</sub>  | 21.667              | 6           | 3.90         | 1.95        | 35.00              | 47.00              | 25.00       |
| USW            | D <sub>1/8</sub>  | 23.875              | 8           | 4.50         | 2.25        | 38.00              | 51.00              | 27.00       |
| USW            | D <sub>1/16</sub> | 24.938              | 8           | 4.00         | 2.00        | 44.00              | 26.50              | 28.00       |
| TSW            | D <sub>0</sub>    | 24.375              | 8           | 5.00         | 2.50        | 38.00              | 50.00              | 22.00       |
| TSW            | D <sub>1/2</sub>  | 26.250              | 6           | 5.00         | 2.50        | 39.00              | 48.00              | 26.00       |
| TSW            | D <sub>1/4</sub>  | 25.571              | 7           | 4.00         | 2.00        | 44.00              | 57.00              | 25.50       |
| TSW            | D <sub>1/8</sub>  | 20.000              | 5           | 2.50         | 1.25        | 32.00              | 40.00              | 29.50       |
| TSW            | D <sub>1/16</sub> | 22.100              | 7           | 3.50         | 1.75        | 39.50              | 50.50              | 25.40       |
| TSWP           | D <sub>0</sub>    | 21.625              | 8           | 3.50         | 1.75        | 36.00              | 48.00              | 25.00       |
| TSWP           | D <sub>1/2</sub>  | 25.071              | 7           | 3.50         | 1.75        | 40.50              | 52.50              | 24.00       |
| TSWP           | D <sub>1/4</sub>  | 19.250              | 6           | 3.50         | 1.75        | 34.00              | 44.00              | 27.00       |
| TSWP           | D <sub>1/8</sub>  | 17.857              | 7           | 3.00         | 1.50        | 29.00              | 47.00              | 28.00       |
| TSWP           | D <sub>1/16</sub> | 20.000              | 8           | 3.00         | 1.50        | 33.50              | 52.50              | 30.00       |
| Freshwater     | D <sub>0</sub>    | 17.417              | 6           | 3.30         | 1.65        | 24.00              | 40.00              | 16.00       |
| <b>Block 2</b> |                   |                     |             |              |             |                    |                    |             |
| USW            | D <sub>0</sub>    | 17.000              | 8           | 4.00         | 2.00        | 39.00              | 54.00              | 23.00       |
| USW            | D <sub>1/2</sub>  | 22.571              | 7           | 3.50         | 1.75        | 32.00              | 43.00              | 21.00       |
| USW            | D <sub>1/4</sub>  | 21.750              | 8           | 4.50         | 2.25        | 37.00              | 47.00              | 27.00       |
| USW            | D <sub>1/8</sub>  | 20.857              | 7           | 3.50         | 1.75        | 37.00              | 47.00              | 28.00       |
| USW            | D <sub>1/16</sub> | 24.833              | 6           | 3.50         | 1.75        | 39.00              | 51.00              | 28.00       |
| TSW            | D <sub>0</sub>    | 24.250              | 8           | 5.00         | 2.50        | 39.00              | 52.00              | 24.00       |
| TSW            | D <sub>1/2</sub>  | 32.429              | 7           | 5.00         | 2.50        | 43.00              | 57.00              | 26.00       |
| TSW            | D <sub>1/4</sub>  | 23.875              | 8           | 5.30         | 2.65        | 39.00              | 52.00              | 33.00       |
| TSW            | D <sub>1/8</sub>  | 28.643              | 7           | 5.00         | 2.50        | 49.00              | 59.00              | 24.00       |
| TSW            | D <sub>1/16</sub> | 21.083              | 6           | 3.50         | 1.75        | 34.00              | 46.00              | 27.00       |
| TSWP           | D <sub>0</sub>    | 24.571              | 7           | 4.40         | 2.20        | 39.00              | 53.00              | 23.00       |
| TSWP           | D <sub>1/2</sub>  | 19.000              | 7           | 2.50         | 1.25        | 27.00              | 38.00              | 20.00       |
| TSWP           | D <sub>1/4</sub>  | 24.857              | 7           | 5.00         | 2.50        | 42.00              | 45.00              | 33.00       |
| TSWP           | D <sub>1/8</sub>  | 17.286              | 7           | 3.00         | 1.50        | 30.00              | 46.50              | 29.00       |
| TSWP           | D <sub>1/16</sub> | 19.667              | 6           | 2.50         | 1.25        | 27.00              | 37.00              | 26.50       |
| Freshwater     | D <sub>0</sub>    | 20.286              | 7           | 5.00         | 2.50        | 34.00              | 44.00              | 26.00       |

| Block3     |                   |        |   |      |      |       |       |       |
|------------|-------------------|--------|---|------|------|-------|-------|-------|
| USW        | D <sub>o</sub>    | 18.833 | 6 | 4.00 | 2.00 | 33.00 | 30.00 | 22.00 |
| USW        | D <sub>1/2</sub>  | 17.429 | 7 | 3.20 | 1.60 | 34.00 | 44.00 | 23.00 |
| USW        | D <sub>1/4</sub>  | 22.286 | 7 | 4.00 | 2.00 | 36.00 | 47.00 | 25.00 |
| USW        | D <sub>1/8</sub>  | 20.857 | 7 | 3.50 | 1.75 | 37.00 | 47.00 | 28.00 |
| USW        | D <sub>1/16</sub> | 22.000 | 8 | 4.00 | 2.00 | 39.00 | 52.00 | 26.00 |
| TSW        | D <sub>o</sub>    | 19.625 | 8 | 5.00 | 2.50 | 39.00 | 52.00 | 24.00 |
| TSW        | D <sub>1/2</sub>  | 22.143 | 7 | 5.50 | 2.75 | 39.00 | 49.00 | 27.00 |
| TSW        | D <sub>1/4</sub>  | 23.429 | 7 | 4.50 | 2.25 | 44.00 | 56.50 | 26.00 |
| TSW        | D <sub>1/8</sub>  | 17.667 | 6 | 3.00 | 1.50 | 33.00 | 44.00 | 28.00 |
| TSW        | D <sub>1/16</sub> | 20.286 | 7 | 3.00 | 2.50 | 34.00 | 45.00 | 26.00 |
| TSWP       | D <sub>o</sub>    | 25.286 | 7 | 5.00 | 2.50 | 39.00 | 50.00 | 22.00 |
| TSWP       | D <sub>1/2</sub>  | 21.857 | 7 | 3.50 | 1.75 | 33.00 | 45.00 | 22.00 |
| TSWP       | D <sub>1/4</sub>  | 20.000 | 7 | 3.00 | 1.50 | 32.00 | 47.00 | 26.00 |
| TSWP       | D <sub>1/8</sub>  | 22.333 | 6 | 3.00 | 1.50 | 33.00 | 47.50 | 28.00 |
| TSWP       | D <sub>1/16</sub> | 20.500 | 6 | 2.50 | 1.25 | 31.00 | 37.50 | 27.00 |
| Freshwater | D <sub>o</sub>    | 18.500 | 6 | 3.00 | 1.50 | 33.00 | 40.00 | 30.00 |

**Table S2:** Experimental responses in the randomized complete block (RCB) design

| Block | Run | A:<br>Treatment | B:<br>Dilution | R1:Total<br>Phenol (mg<br>GA/g) /FW | R2:Chll(a+b)<br>(mg/g)/FW | R3:Carotenoid<br>$\mu\text{g/ml}$ /FW | R4 :POD<br>(Units<br>$\text{mg}^{-1}$ /FW) | R5 : CAT<br>(Units $\text{mg}^{-1}$<br>/FW) |
|-------|-----|-----------------|----------------|-------------------------------------|---------------------------|---------------------------------------|--------------------------------------------|---------------------------------------------|
| (1)   | 1   | USW             | D1/8           | 340.47                              | 8.72875                   | 0.56207                               | 4.8                                        | 1.7                                         |
|       | 2   | Control         | D1/4           | 312.07                              | 4.37815                   | 1.33145                               | 1.8                                        | 0.82                                        |
|       | 3   | TSWP            | D1/4           | 326.32                              | 8.70667                   | 0.95627                               | 1.76                                       | 0.77                                        |
|       | 4   | TSW             | D1/4           | 328.13                              | 8.916713                  | 1.403454                              | 2                                          | 1.2                                         |
|       | 5   | control         | D1/8           | 312.07                              | 4.378157                  | 1.382373                              | 1.77                                       | 0.8                                         |
|       | 6   | control         | D1/2           | 312.07                              | 4.378157                  | 0.364043                              | 1.824                                      | 0.77                                        |
|       | 7   | TSWP            | D0             | 422.86                              | 7.103693                  | 0.733279                              | 1.94                                       | 1.2                                         |
|       | 8   | TSW             | D0             | 366.55                              | 8.860357                  | 0.520203                              | 3.2                                        | 1.8                                         |
|       | 9   | TSWP            | D1/16          | 70.882                              | 10.44841                  | 1.342666                              | 1.73                                       | 0.75                                        |
|       | 10  | TSW             | D1/16          | 76.19                               | 10.46104                  | 1.093985                              | 2.3                                        | 1,4                                         |
|       | 11  | TSWP            | D1/2           | 298.52                              | 8.292809                  | 1.062006                              | 1.88                                       | 0,89                                        |
|       | 12  | TSW             | D1/2           | 124.67                              | 9.933486                  | 1.372761                              | 2.7                                        | 2,412                                       |
|       | 13  | USW             | D1/2           | 318.54                              | 8.290826                  | 0.670642                              | 4.9                                        | 1,4                                         |
|       | 14  | control         | D0             | 309.01                              | 4.597301                  | 1.393136                              | 1.73                                       | 0,811                                       |
|       | 15  | TSWP            | D1/8           | 93.889                              | 8.784964                  | 1.083104                              | 1.88                                       | 0,83                                        |
|       | 16  | TSW             | D1/8           | 107.79                              | 9.556311                  | 1.372915                              | 2.2                                        | 1.1                                         |
|       | 17  | USW             | D0             | 297                                 | 9.522237                  | 0.352662                              | 5.4                                        | 2.02                                        |
|       | 18  | control         | D1/16          | 309.42                              | 4.597301                  | 1.291303                              | 1.76                                       | 0.77                                        |
|       | 19  | USW             | D1/4           | 304.86                              | 8.432385                  | 0.424652                              | 5.02                                       | 1.8                                         |

|            |    |         |       |        |          |          |       |       |
|------------|----|---------|-------|--------|----------|----------|-------|-------|
|            | 20 | USW     | D1/16 | 365.38 | 10.37983 | 0.948291 | 4.6   | 1.5   |
| <b>(2)</b> | 21 | USW     | D1/4  | 303.27 | 8.219151 | 0.500297 | 5.077 | 1.833 |
|            | 22 | control | D1/8  | 261.89 | 3.629449 | 1.06962  | 1.78  | 0.78  |
|            | 23 | TSWP    | D1/4  | 321.55 | 9.018123 | 0.920017 | 1.747 | 0.758 |
|            | 24 | TSW     | D1/4  | 330.12 | 9.0029   | 1.41702  | 2.04  | 1.24  |
|            | 25 | TSWP    | D1/8  | 113.11 | 11.22868 | 1.453244 | 1.865 | 0.81  |
|            | 26 | TSW     | D1/8  | 104.62 | 9.324879 | 1.267291 | 2.25  | 1.123 |
|            | 27 | control | D1/16 | 262.1  | 3.479983 | 1.103764 | 1.8   | 0.83  |
|            | 28 | control | D0    | 261.46 | 3.417798 | 1.148767 | 1.78  | 0.83  |
|            | 29 | USW     | D0    | 280.77 | 9.349168 | 0.340009 | 5.32  | 1.85  |
|            | 30 | USW     | D1/8  | 346.81 | 8.765673 | 0.489012 | 4.68  | 1.64  |
|            | 31 | control | D1/2  | 261.5  | 3.526761 | 1.06816  | 1.77  | 0.832 |
|            | 32 | control | D1/4  | 261.59 | 3.417798 | 1.148767 | 1.82  | 0.82  |
|            | 33 | TSWP    | D0    | 435.78 | 7.607792 | 0.680201 | 1.96  | 1.15  |
|            | 34 | TSW     | D0    | 378.73 | 9.35827  | 0.509899 | 3.25  | 1.82  |
|            | 35 | USW     | D1/2  | 328.92 | 8.714181 | 0.655379 | 4.87  | 1.46  |
|            | 36 | TSWP    | D1/2  | 340.21 | 9.619537 | 1.350123 | 1.89  | 0.88  |
|            | 37 | TSW     | D1/2  | 119.71 | 9.716814 | 1.208431 | 2.78  | 2.455 |
|            | 38 | TSWP    | D1/16 | 87.206 | 12.77201 | 1.641259 | 1.743 | 0.76  |
|            | 39 | TSW     | D1/16 | 80.359 | 11.13248 | 1.121412 | 2.321 | 1.378 |
|            | 40 | USW     | D1/16 | 317.54 | 9.088912 | 0.830354 | 4.63  | 1.56  |
| <b>(3)</b> | 41 | TSWP    | D1/8  | 99.236 | 9.640934 | 1.247754 | 1.91  | 0.823 |
|            | 42 | TSW     | D1/8  | 110.17 | 3.351988 | 1.126647 | 2.26  | 1.074 |

|  |    |         |       |        |          |          |       |        |
|--|----|---------|-------|--------|----------|----------|-------|--------|
|  | 43 | USW     | D1/4  | 305.04 | 8.343147 | 0.507845 | 5.09  | 1.822  |
|  | 44 | control | D1/2  | 260.73 | 3.928382 | 1.001332 | 1.78  | 0.78   |
|  | 45 | control | D1/8  | 261.62 | 3.853649 | 1.082424 | 1.774 | 0.8    |
|  | 46 | TSWP    | D1/16 | 85.025 | 12.58956 | 1.617813 | 1.742 | 0.7756 |
|  | 47 | TSW     | D1/16 | 81.306 | 11.16615 | 1.116219 | 2.319 | 1.384  |
|  | 48 | TSWP    | D1/2  | 321.17 | 9.110413 | 1.278666 | 1.9   | 0.876  |
|  | 49 | TSW     | D1/2  | 126,66 | 10.15812 | 1.263314 | 2.775 | 2.425  |
|  | 50 | control | D1/16 | 261,72 | 3.853649 | 1.082424 | 1.77  | 0.79   |
|  | 51 | USW     | D0    | 336,13 | 11,09504 | 0.403502 | 5.41  | 1.87   |
|  | 52 | USW     | D1/2  | 337,19 | 8,769916 | 0.709396 | 4.867 | 1.454  |
|  | 53 | USW     | D1/8  | 347,59 | 8,776887 | 0.489638 | 5.5   | 1.93   |
|  | 54 | control | D0    | 261,72 | 3.853649 | 1.082424 | 1.79  | 0.822  |
|  | 55 | TSWP    | D0    | 442,26 | 7.704625 | 0.688859 | 1.94  | 1.23   |
|  | 56 | TSW     | D0    | 385,57 | 9.310371 | 0.546624 | 3.18  | 1.83   |
|  | 57 | USW     | D1/16 | 317,16 | 9.179755 | 0.748893 | 4.626 | 1.55   |
|  | 58 | control | D1/4  | 261,5  | 3.853649 | 1.082424 | 1.78  | 0.79   |
|  | 59 | TSWP    | D1/4  | 321.74 | 8.63601  | 0.948518 | 1.75  | 0.763  |
|  | 60 | TSW     | D1/4  | 337.1  | 9.154054 | 1.440811 | 2.06  | 1.2    |

**Table S3.** Models final equations in terms of coded factors for all the tested responses

| Responses            | Final Equation in Terms of Coded Factors                                                                                                                                                                                                                                                                                                                                                                                                                                                                                                                                                                                                                                                           |
|----------------------|----------------------------------------------------------------------------------------------------------------------------------------------------------------------------------------------------------------------------------------------------------------------------------------------------------------------------------------------------------------------------------------------------------------------------------------------------------------------------------------------------------------------------------------------------------------------------------------------------------------------------------------------------------------------------------------------------|
| R1: Total phenols/FW | $\begin{aligned} & -84,55 \text{ A}[1]\text{B}[1] \\ & -102,39 \text{ A}[2]\text{B}[1] \\ & 89,2 \text{ A}[3]\text{B}[1] \\ & 13,79 \text{ A}[1] \quad 83,91 \text{ B}[1] \quad 1,82 \text{ A}[1]\text{B}[2] \\ \text{Total Phenol/FW} = & 264,24 + 58,87 \text{ A}[2] + -1,75 \text{ B}[2] + 6,86 \text{ A}[2]\text{B}[2] \\ & -60,4 \text{ A}[3] \quad 45,2 \text{ B}[3] \quad -78,42 \text{ A}[3]\text{B}[2] \\ & -55,97 \text{ B}[4] \quad -44,84 \text{ A}[1]\text{B}[3] \\ & -63,92 \text{ A}[2]\text{B}[3] \\ & 82,74 \text{ A}[3]\text{B}[3] \\ & 56,47 \text{ A}[1]\text{B}[4] \\ & 77,82 \text{ A}[2]\text{B}[4] \\ & -40,35 \text{ A}[3]\text{B}[4] \end{aligned}$                      |
| R2: Chll( a+b)/FW    | $\begin{aligned} & +0.2894 \text{ A}[1]\text{B}[1] \\ & +1.22 \text{ A}[2]\text{B}[1] \\ & -3.98 \text{ A}[1] \quad -0.2761 \text{ B}[1] \quad +0.1588 \text{ A}[3]\text{B}[1] \\ \text{Chll(a+b )/FW} = & +7.92 + +1.12 \text{ A}[2] + -0.0545 \text{ B}[2] + +0.0560 \text{ A}[1]\text{B}[2] \\ & +1.37 \text{ A}[3] \quad -0.4179 \text{ B}[3] \quad -0.3976 \text{ A}[2]\text{B}[2] \\ & -0.4228 \text{ B}[4] \quad +0.6971 \text{ A}[3]\text{B}[2] \\ & +0.3582 \text{ A}[1]\text{B}[3] \\ & -0.2943 \text{ A}[2]\text{B}[3] \\ & +0.1489 \text{ A}[3]\text{B}[3] \\ & +0.4336 \text{ A}[1]\text{B}[4] \\ & +0.1362 \text{ A}[2]\text{B}[4] \\ & -1.46 \text{ A}[3]\text{B}[4] \end{aligned}$ |
| R3: Carotenoids/FW   | $\begin{aligned} & +0.3835 \text{ A}[1]\text{B}[1] \\ & +0.0741 \text{ A}[2]\text{B}[1] \\ & +0.1247 \text{ A}[1] \quad -0.2842 \text{ B}[1] \quad -0.3090 \text{ A}[3]\text{B}[1] \\ \text{Carotenoids/FW} = & 0.9842 + -0.4087 \text{ A}[2] + +0.0162 \text{ B}[2] + -0.3138 \text{ A}[1]\text{B}[2] \\ & +0.1346 \text{ A}[3] \quad +0.0226 \text{ B}[3] \quad +0.0868 \text{ A}[2]\text{B}[2] \\ & +0.0680 \text{ B}[4] \quad +0.1466 \text{ A}[3]\text{B}[2] \end{aligned}$                                                                                                                                                                                                                   |

|            |                                                                                                                                                                                                                                                                                                                                                                                                                                                                              |
|------------|------------------------------------------------------------------------------------------------------------------------------------------------------------------------------------------------------------------------------------------------------------------------------------------------------------------------------------------------------------------------------------------------------------------------------------------------------------------------------|
|            | <div> <div>+0.0561 A[1]B[3]</div> <div>-0.1205 A[2]B[3]</div> <div>+0.2791 A[3]B[3]</div> <div>+0.0013 A[1]B[4]</div> <div>-0.1299 A[2]B[4]</div> <div>+0.0689 A[3]B[4]</div> </div>                                                                                                                                                                                                                                                                                         |
| R4: POD/FW | <div> <div>-0.3104 A[1]B[1]</div> <div>+0.0955 A[2]B[1]</div> <div>-0.9980 A[1] +0.2952 B[1] +0.4058 A[3]B[1]</div> <div>POD/FW = +2.78 + +2.21 A[2] + +0.0482 B[2] + -0.0387 A[1]B[2]</div> <div>-0.2708 A[3] -0.1178 B[3] -0.1552 A[2]B[2]</div> <div>-0.0574 B[4] +0.1945 A[3]B[2]</div> <div>+0.1360 A[1]B[3]</div> <div>+0.1942 A[2]B[3]</div> <div>-0.3578 A[3]B[3]</div> <div>+0.0502 A[1]B[4]</div> <div>+0.0647 A[2]B[4]</div> <div>-0.2149 A[3]B[4]</div> </div>   |
| R5: CAT/FW | <div> <div>-0.1757 A[1]B[1]</div> <div>+0.0270 A[2]B[1]</div> <div>-0.4393 A[1] +0.1937 B[1] +0.0335 A[3]B[1]</div> <div>CAT/FW = +1.24 + +0.4503 A[2] + +0.1438 B[2] + -0.1528 A[1]B[2]</div> <div>+0.3471 A[3] -0.0910 B[3] -0.3984 A[2]B[2]</div> <div>-0.1248 B[4] +0.6974 A[3]B[2]</div> <div>+0.0980 A[1]B[3]</div> <div>+0.2167 A[2]B[3]</div> <div>-0.2851 A[3]B[3]</div> <div>+0.1152 A[1]B[4]</div> <div>+0.1889 A[2]B[4]</div> <div>-0.3656 A[3]B[4]</div> </div> |
